# Supplementary material
Source: Springer Nature journal article supplement (https://www.springermedizin.de/resource/supplementary/13034_2014_272_MOESM1_ESM.pdf/9652688)

Figure 1:

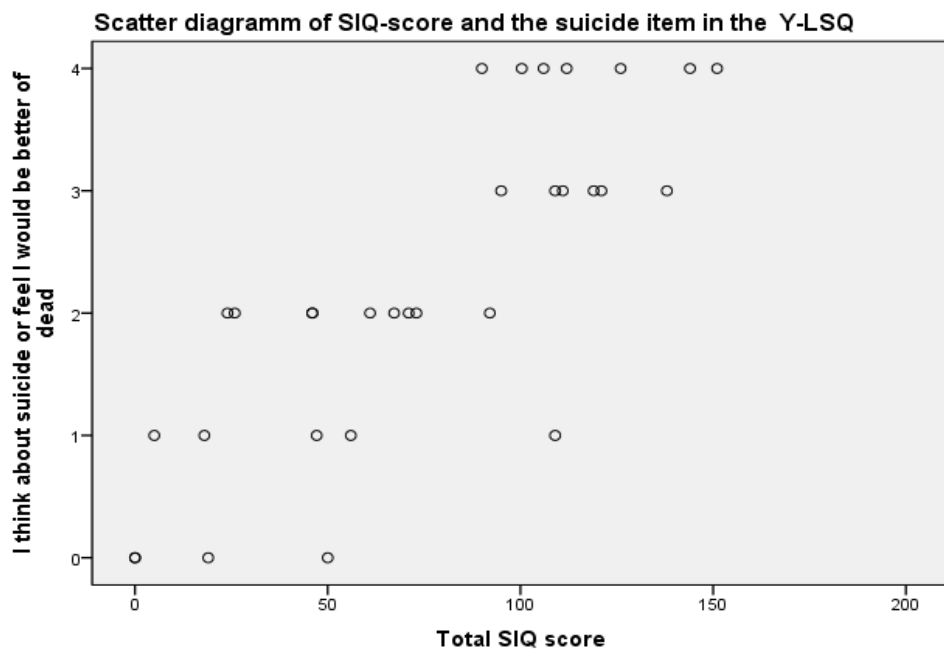

Supplement: MOESM1 [file 9652688]
